# Supplementary material
Source: PubMed Central journal article supplement (PMC10933714)
Supplement: jama-e240865-s002.pdf [file jama-e240865-s002.pdf]

## **Data Sharing Statement**

### **Data**

**Data available:** No

### **Additional Information**

**Explanation for why data not available:** Data are not available immediately. The US Monitoring the Future makes data publicly available; however, there is usually a 18 month lag between data collection and making the data publicly downloadable. Because the data are currently restricted until then, there will be a delay. If a specific request for the data is made before then, requests to the second author who is the Director the Monitoring the Future Study should be made.
